# Supplementary material for: Proteome Mapping of South African Cassava Mosaic Virus-Infected Susceptible and Tolerant Landraces of Cassava
Source: MDPI journal article supplement (doi:10.3390/proteomes9040041), 2021-10-23
Supplement: s1 [file s1]

# Proteome mapping of tolerant TME3 and susceptible T200 cassava landraces infected with South African cassava mosaic virus

Elelwani Ramulifho <sup>1,2</sup>, Chrissie Rey <sup>1,\*</sup>

## Supplementary Materials

Table S1. Primers used for RT-qPCR

| Gene Name                                        | Primer Sequences                                                    |
|--------------------------------------------------|---------------------------------------------------------------------|
| <i>UBQ10</i>                                     | Fwd: 5' TGCATCTCGTTCTCCGATTG 3'<br>Rev: 5' GCGAAGATCAGTCGTTGTTGG 3' |
| Manes.05G194900 (Receptor like kinase_1)         | Fwd: 5' AGTCAGACCTCATCGACCCA 3'<br>Rev: 5' AACCTGAGCAACTCGACCAG 3'  |
| Manes.06G055700 (Receptor like protein)          | Fwd: 5' GCCCCTACCTTCACAGCATT 3'<br>Rev: 5' AACAGCAGCAGTCTCAGCAT 3'  |
| Manes.08G126700 (Kinase)                         | Fwd: 5' GTGGGCCTGTAAAGGATGCT 3'<br>Rev: 5' TCGATGCCGAGACAAACCAA 3'  |
| Manes.14G124000 (Receptor like kinase_2)         | Fwd: 5' TCCACCATTAACTGGGCAC 3'<br>Rev: 5' CCCATGAGGAACAGCACGAT 3'   |
| Manes.18G115700 (LRR)                            | Fwd: 5' GCCTCAAACCTCACCTCAGCT 3'<br>Rev: 5' GCTGAGCATAGCAGATGGGT 3' |
| Manes.08G075100 (C3HC4-type RING finger)         | Fwd: 5' CCGTTTTATGCCCCTCCTGT 3'<br>Rev: 5' TCTCACCTCTGGCCTCTCTC 3'  |
| Manes.15G008400 (Pathogenesis-related protein_1) | Fwd: 5' TGAAGGTGATCCGTGGTTGG 3'<br>Rev: 5' TGGTGCACTTGCTGATGGAT 3'  |
| Manes.18G143800 ( <i>LRX2</i> )                  | Fwd: 5' ATTTCCGGGATCACCACCAC 3'<br>Rev: 5' CTGTTGCTGAGGAGGTGGAG 3'  |
| Manes.01G100900 ( <i>SnRK1.1</i> )               | Fwd: 5' AGAAGTCCTCAAAGCCCTGC 3'<br>Rev: 5' CCTGGAATCCACCTGCACTT 3'  |
| Manes.15G007900 (Pathogenesis-related protein_2) | Fwd: 5' TCCGGCAAAGCTGTACAGAG 3'<br>Rev: 5' TTCTTGATGGTTCCAGGCC 3'   |

**Table S2.** Gene Ontology annotation of differentially expressed proteins of T200 and TME3 at 32 dpi.

| GO functional groups                             | T200 OE <sup>a</sup> | T200 UE <sup>b</sup> | TME3 OE | TME3 UE |
|--------------------------------------------------|----------------------|----------------------|---------|---------|
| <b>Cellular Component</b>                        |                      |                      |         |         |
| Cell wall                                        | 16%                  | 13%                  | 14%     | 15%     |
| Chloroplast                                      | 16%                  | 50%                  | 27%     | 44%     |
| Cytoplasm                                        | 58%                  | 40%                  | 36%     | 56%     |
| Cytosol                                          | 16%                  | 40%                  | 32%     | 30%     |
| Endoplasmic reticulum                            | -                    | 3%                   | -       | 4%      |
| Endosome                                         | -                    | 3%                   | 5%      | -       |
| External encapsulating structure                 | -                    | 3%                   | -       | 4%      |
| Extracellular region                             | 21%                  | 23%                  | 14%     | 30%     |
| Golgi apparatus                                  | -                    | 3%                   | -       | 4%      |
| Mitochondrion                                    | 37%                  | 13%                  | 23%     | 22%     |
| Nucleus                                          | 11%                  | 33%                  | 18%     | 30%     |
| Other cellular components                        | 11%                  | 10%                  | 5%      | 15%     |
| other intracellular components                   | 32%                  | 23%                  | 32%     | 22%     |
| other membranes                                  | 21%                  | 17%                  | 18%     | 19%     |
| Peroxisome                                       | -                    | 3%                   | -       | 4%      |
| Plasma membrane                                  | 16%                  | 27%                  | 23%     | 22%     |
| Plastid                                          | 26%                  | 40%                  | 27%     | 41%     |
| Thylakoid                                        | -                    | 3%                   | 5%      | -       |
| Vacuole                                          | -                    | 13%                  | 5%      | 15%     |
| Unknown cellular components                      | -                    | 3%                   | 5%      | -       |
| <b>Biological Process</b>                        |                      |                      |         |         |
| Anatomical structure development                 | -                    | 11%                  | -       | 13%     |
| Biosynthetic process                             | 20%                  | 26%                  | 5%      | 39%     |
| Carbohydrate metabolic process                   | 7%                   | 11%                  | -       | 17%     |
| Catabolic process                                | 20%                  | 22%                  | 26%     | 17%     |
| Cell communication                               | 7%                   | -                    | 5%      | -       |
| Cell cycle                                       | -                    | 4%                   | 5%      | -       |
| Cellular component organization                  | 7%                   | 15%                  | 11%     | 13%     |
| Cellular protein modification process            | 7%                   | 4%                   | -       | 9%      |
| Circadian rhythm                                 | -                    | 4%                   | -       | 4%      |
| DNA metabolic process                            | -                    | 4%                   | 5%      | -       |
| Embryo development                               | -                    | 4%                   | -       | 4%      |
| Flower development                               | -                    | 4%                   | -       | 4%      |
| Generation of precursor metabolites and energy   | 7%                   | 7%                   | 5%      | 9%      |
| Lipid metabolic process                          | 7%                   | 15%                  | 5%      | 17%     |
| Multicellular organism development               | 7%                   | 19%                  | 5%      | 22%     |
| Nucleobase-containing compound metabolic process | -                    | 15%                  | -       | 13%     |
| Other biological processes                       | -                    | 4%                   | -       | 4%      |
| Other cellular processes                         | 67%                  | 59%                  | 53%     | 70%     |
| Other metabolic processes                        | 60%                  | 55%                  | 47%     | 65%     |

|                                  |     |     |     |     |
|----------------------------------|-----|-----|-----|-----|
| Post-embryogenic development     | -   | 7%  | -   | 9%  |
| Protein metabolic process        | 20% | 11% | 11% | 17% |
| Regulation of molecular function | -   | 4%  | -   | 4%  |
| Reproduction                     | -   | 15% | 5%  | 13% |
| Response to abiotic stimulus     | -   | 26% | 11% | 22% |
| Response to biotic stimulus      | 13% | 7%  | 5%  | 13% |
| Response to chemical             | 20% | 7%  | 5%  | 17% |
| Response to endogenous stimulus  | 7%  | -   | -   | 4%  |
| Response to external stimulus    | 20% | 11% | 11% | 17% |
| Response to light stimulus       | 7%  | 11% | -   | 17% |
| Response to stress               | 33% | 30% | 37% | 26% |
| Secondary metabolic process      | 13% | 4%  | 5%  | 9%  |
| Signal transduction              | 7%  | 8%  | 5%  | 9%  |
| Translation                      | -   | 8%  | -   | 9%  |
| Transport                        | -   | 8%  | 11% | -   |
| Unknown biological processes     | -   | 8%  | 5%  | 4%  |
| <b>Molecular Function</b>        |     |     |     |     |
| Catalytic activity               | 57% | 32% | 47% | 38% |
| DNA binding                      | -   | 4%  | -   | 4%  |
| Enzyme regulator activity        | -   | 4%  | -   | 4%  |
| Hydrolase activity               | 36% | 24% | 33% | 25% |
| Kinase activity                  | -   | 4%  | -   | 4%  |
| Lipid binding                    | -   | 4%  | -   | 4%  |
| Nucleic acid binding             | -   | 4%  | -   | 4%  |
| Nucleotide binding               | 21% | 8%  | 13% | 13% |
| Other binding                    | 43% | 36% | 40% | 38% |
| Protein binding                  | 7%  | 24% | 7%  | 25% |
| RNA binding                      | -   | 16% | 7%  | 13% |
| Transferase activity             | 29% | 16% | 13% | 25% |
| Transporter activity             | 7%  | 4%  | -   | 8%  |
| Unknown molecular functions      | -   | 8%  | 13% | 4%  |

<sup>a</sup> OE is short for over-expressed differentially expressed proteins

<sup>b</sup> UE is short for under-expressed differentially expressed proteins

**Table S3.** Gene Ontology annotation of differentially expressed proteins of T200 and TME3 at 67 dpi.

| GO functional groups                  | T200 OE <sup>a</sup> | T200 UE <sup>b</sup> | TME3 OE | TME3 UE |
|---------------------------------------|----------------------|----------------------|---------|---------|
| <b>Cellular Component</b>             |                      |                      |         |         |
| Cell wall                             | 9%                   | 21%                  | 13%     | 12%     |
| Chloroplast                           | 45%                  | 48%                  | 56%     | 31%     |
| Cytoplasm                             | 47%                  | 34%                  | 44%     | 43%     |
| Cytoskeleton                          | 1%                   | -                    | -       | 1%      |
| Cytosol                               | 50%                  | 38%                  | 53%     | 40%     |
| Endoplasmic reticulum                 | 9%                   | 9%                   | 6%      | 14%     |
| Endosome                              | 1%                   | -                    | -       | 2%      |
| External encapsulating structure      | 1%                   | 2%                   | 1%      | 1%      |
| Extracellular region                  | 12%                  | 33%                  | 17%     | 20%     |
| Golgi apparatus                       | 10%                  | 9%                   | 8%      | 12%     |
| Mitochondrion                         | 20%                  | 24%                  | 24%     | 17%     |
| Nuclear envelope                      | 1%                   | -                    | -       | 2%      |
| Nucleolus                             | 2%                   | 5%                   | 3%      | 4%      |
| Nucleus                               | 29%                  | 31%                  | 26%     | 35%     |
| Other cellular components             | 17%                  | 14%                  | 12%     | 22%     |
| Other intracellular components        | 23%                  | 29%                  | 25%     | 25%     |
| Other membranes                       | 18%                  | 22%                  | 18%     | 21%     |
| Peroxisome                            | 4%                   | 5%                   | 5%      | 2%      |
| Plasma membrane                       | 20%                  | 28%                  | 22%     | 22%     |
| Plastid                               | 25%                  | 29%                  | 32%     | 17%     |
| Ribosome                              | 2%                   | 14%                  | 6%      | 5%      |
| Thylakoid                             | 6%                   | 16%                  | 13%     | 4%      |
| Vacuole                               | 16%                  | 12%                  | 16%     | 12%     |
| Unknown cellular components           | -                    | -                    | -       | 1%      |
| <b>Biological Process</b>             |                      |                      |         |         |
| Anatomical structure development      | 17%                  | 16%                  | 12%     | 24%     |
| Biosynthetic process                  | 36%                  | 22%                  | 35%     | 28%     |
| Carbohydrate metabolic process        | 10%                  | 8%                   | 13%     | 4%      |
| Catabolic process                     | 17%                  | 12%                  | 19%     | 12%     |
| Cell communication                    | 6%                   | 6%                   | 5%      | 9%      |
| Cell cycle                            | 2%                   | -                    | -       | 3%      |
| Cell death                            | 3%                   | 2%                   | 1%      | 6%      |
| Cell differentiation                  | 4%                   | 4%                   | 5%      | 3%      |
| Cell growth                           | 4%                   | -                    | 3%      | 3%      |
| Cellular component organization       | 11%                  | 16%                  | 11%     | 15%     |
| Cellular homeostasis                  | 1%                   | -                    | -       | 1%      |
| Cellular protein modification process | 9%                   | 24%                  | 14%     | 12%     |
| Circadian rhythm                      | 2%                   | 4%                   | 3%      | 1%      |
| DNA metabolic process                 | 1%                   | 2%                   | 1%      | 1%      |
| Embryo development                    | 2%                   | 6%                   | 2%      | 4%      |

|                                                  |     |     |     |     |
|--------------------------------------------------|-----|-----|-----|-----|
| Generation of precursor metabolites and energy   | 1%  | 8%  | 8%  | -   |
| Flower development                               | 4%  | 2%  | -   | 3%  |
| Growth                                           | 5%  |     | 4%  | 3%  |
| Lipid metabolic process                          | 11% | 2%  | 6%  | 12% |
| Multicellular organism development               | 17% | 16% | 13% | 22% |
| Nucleobase-containing compound metabolic process | 12% | 20% | 13% | 18% |
| Other biological processes                       | 5%  | -   | 3%  | 4%  |
| Other cellular processes                         | 77% | 62% | 71% | 75% |
| Other metabolic processes                        | 63% | 54% | 67% | 51% |
| Photosynthesis                                   | 2%  | 8%  | 6%  | -   |
| Pollination                                      | 2%  | 2%  | 3%  | 1%  |
| Post-embryogenic development                     | 8%  | 6%  | 5%  | 12% |
| Protein metabolic process                        | 9%  | 20% | 13% | 10% |
| Regulation of gene expression, epigenetic        | -   | 2%  | 1%  | -   |
| Regulation of molecular function                 | -   | 2%  | -   | 1%  |
| Reproduction                                     | 9%  | 8%  | 6%  | 12% |
| Response to abiotic stimulus                     | 22% | 16% | 22% | 19% |
| Response to biotic stimulus                      | 8%  | 6%  | 9%  | 12% |
| Response to chemical                             | 35% | 20% | 32% | 28% |
| Response to endogenous stimulus                  | 13% | 10% | 11% | 13% |
| Response to external stimulus                    | 12% | 8%  | 13% | 13% |
| Response to light stimulus                       | 6%  | 7%  | 5%  | 9%  |
| Response to stress                               | 31% | 24% | 31% | 28% |
| Secondary metabolic process                      | 4%  | -   | 3%  | 3%  |
| Signal transduction                              | 7%  | 8%  | 5%  | 10% |
| Translation                                      | 5%  | 12% | 6%  | 9%  |
| Transport                                        | 14% | 14% | 11% | 19% |
| Tropism                                          | 1%  | -   | -   | 1%  |
| Unknown biological processes                     | 4%  | 8%  | 6%  | 4%  |
| <b>Molecular Function</b>                        |     |     |     |     |
| Carbohydrate binding                             | 2%  | 4%  | 4%  | -   |
| Catalytic activity                               | 38% | 41% | 46% | 28% |
| Chromatin binding                                | 1%  | 2%  | 1%  | -   |
| DNA binding                                      | 3%  | 6%  | 3%  | 1%  |
| Enzyme regulator activity                        | 22% | 4%  | 3%  | 3%  |
| Hydrolase activity                               | 6%  | 22% | 27% | 15% |
| Kinase activity                                  | 3%  | 6%  | 8%  | 4%  |
| Lipid binding                                    | 1%  | 6%  | 3%  | 4%  |
| Nuclease activity                                | 9%  | -   | -   | 1%  |
| Nucleotide binding                               | 36% | 6%  | 8%  | 7%  |
| Other binding                                    | 2%  | 20% | 31% | 32% |
| Other molecular functions                        | 1%  | -   | 1%  | 3%  |
| Protein binding                                  | 23% | 27% | 23% | 25% |

|                                          |     |     |     |     |
|------------------------------------------|-----|-----|-----|-----|
| RNA binding                              | 12% | 24% | 13% | 20% |
| Signalling receptor activity             | 1%  | 2%  | 1%  | -   |
| Structural molecule activity             | 3%  | 8%  | 3%  | 7%  |
| Transcription regulator activity         | 1%  | -   | -   | 1%  |
| Transferase activity                     | 24% | 14% | 25% | 15% |
| Translation factor activity, RNA binding | 2%  | -   | -   | 3%  |
| Transporter activity                     | 5%  | -   | 2%  | 6%  |
| Unknown molecular functions              | 5%  | 6%  | 5%  | -   |

<sup>a</sup> OE is short for over-expressed differentially expressed proteins

<sup>b</sup> UE is short for under-expressed differentially expressed proteins
