# Supplementary material for: Proteome Mapping of South African Cassava Mosaic Virus-Infected Susceptible and Tolerant Landraces of Cassava
Source: MDPI journal article supplement (doi:10.3390/proteomes9040041), 2021-10-23
Supplement: s1 [file s1]

## Legend Figure S1

**Figure S1.** TME3 differential expressed protein interactions at 67 dpi. **(a)** STRING protein-protein interaction network functional enrichment analysis of over-expressed proteins with  $p$ -value  $< 1.0\text{e-}16$ . Network Settings: Full network; Confidence edge; Text mining; Experiments; Databases; Co-expression Interaction sources; Confidence of 0.7; More than 50 interactors 1<sup>st</sup> and 2<sup>nd</sup> shell; Hide disconnected nodes in the network **(b)** KEGG pathways analysis of over-expressed and under-expressed proteins with false discovery rate (FDR)  $< 0.05$ .
