# Supplementary figures and images for: Proteome Mapping of South African Cassava Mosaic Virus-Infected Susceptible and Tolerant Landraces of Cassava
Source: MDPI journal article supplement (doi:10.3390/proteomes9040041), 2021-10-23

(a)

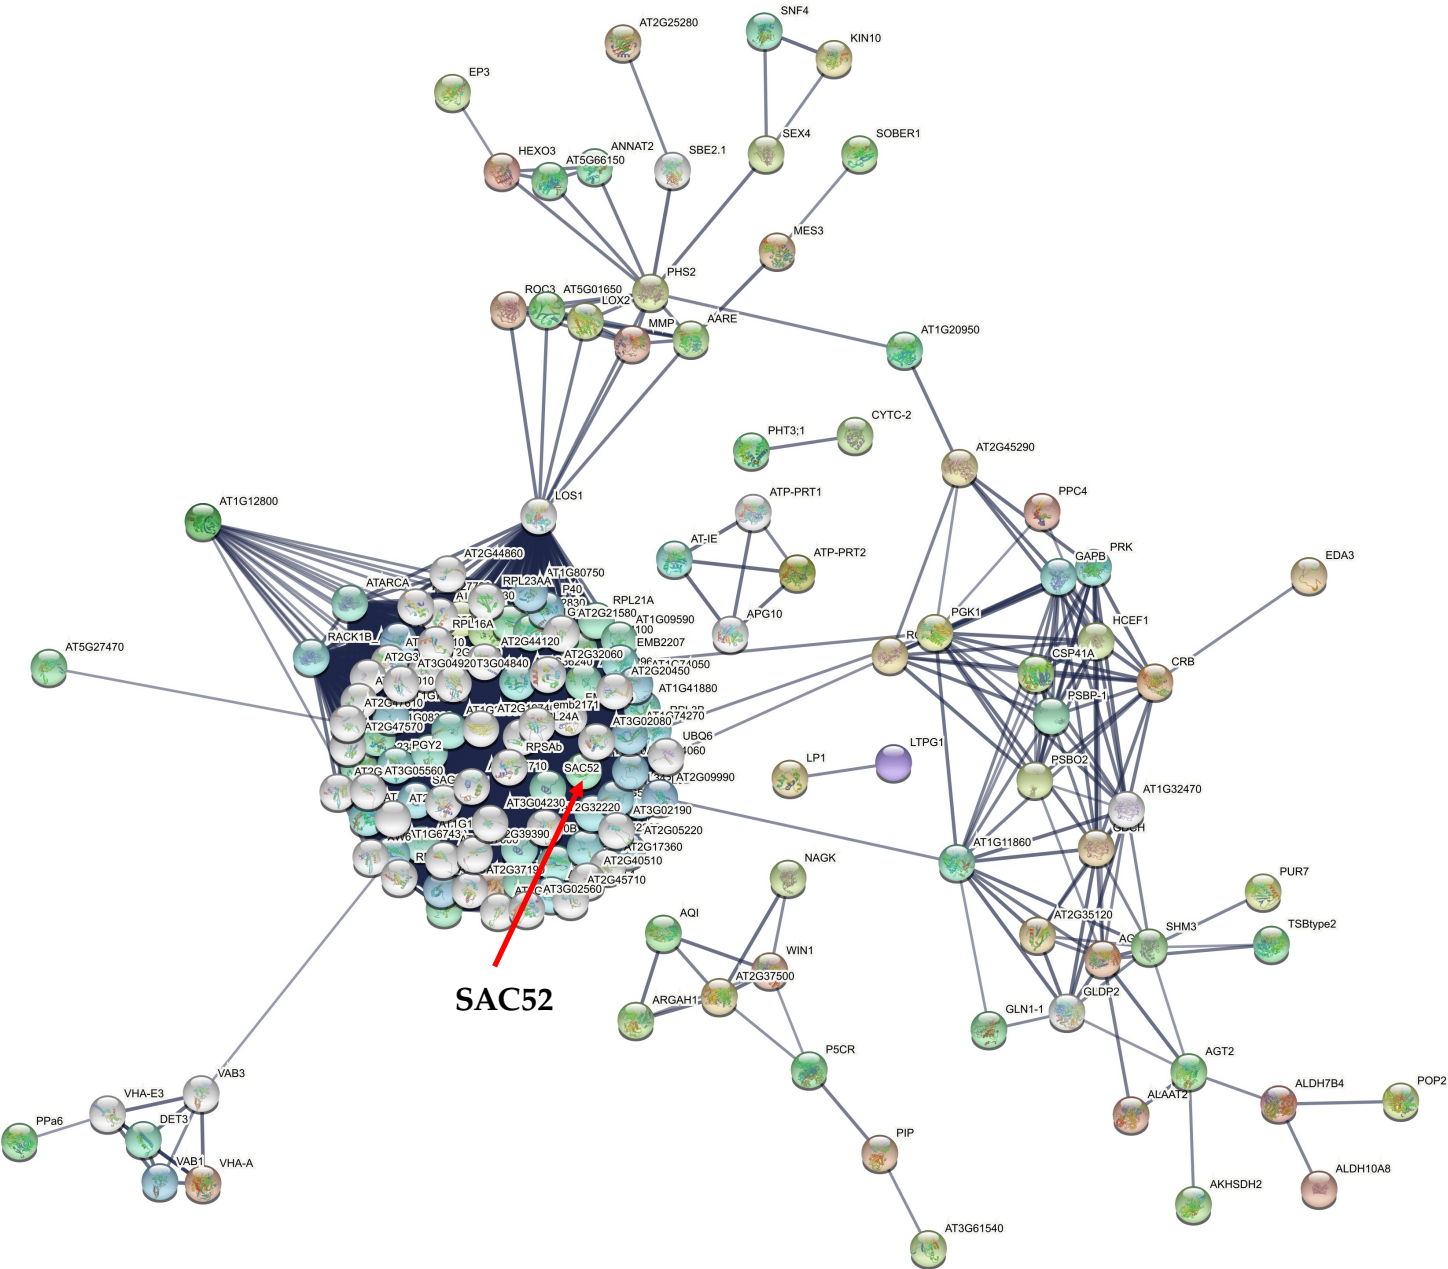

(b)

KEGG: TME3 67 dpi

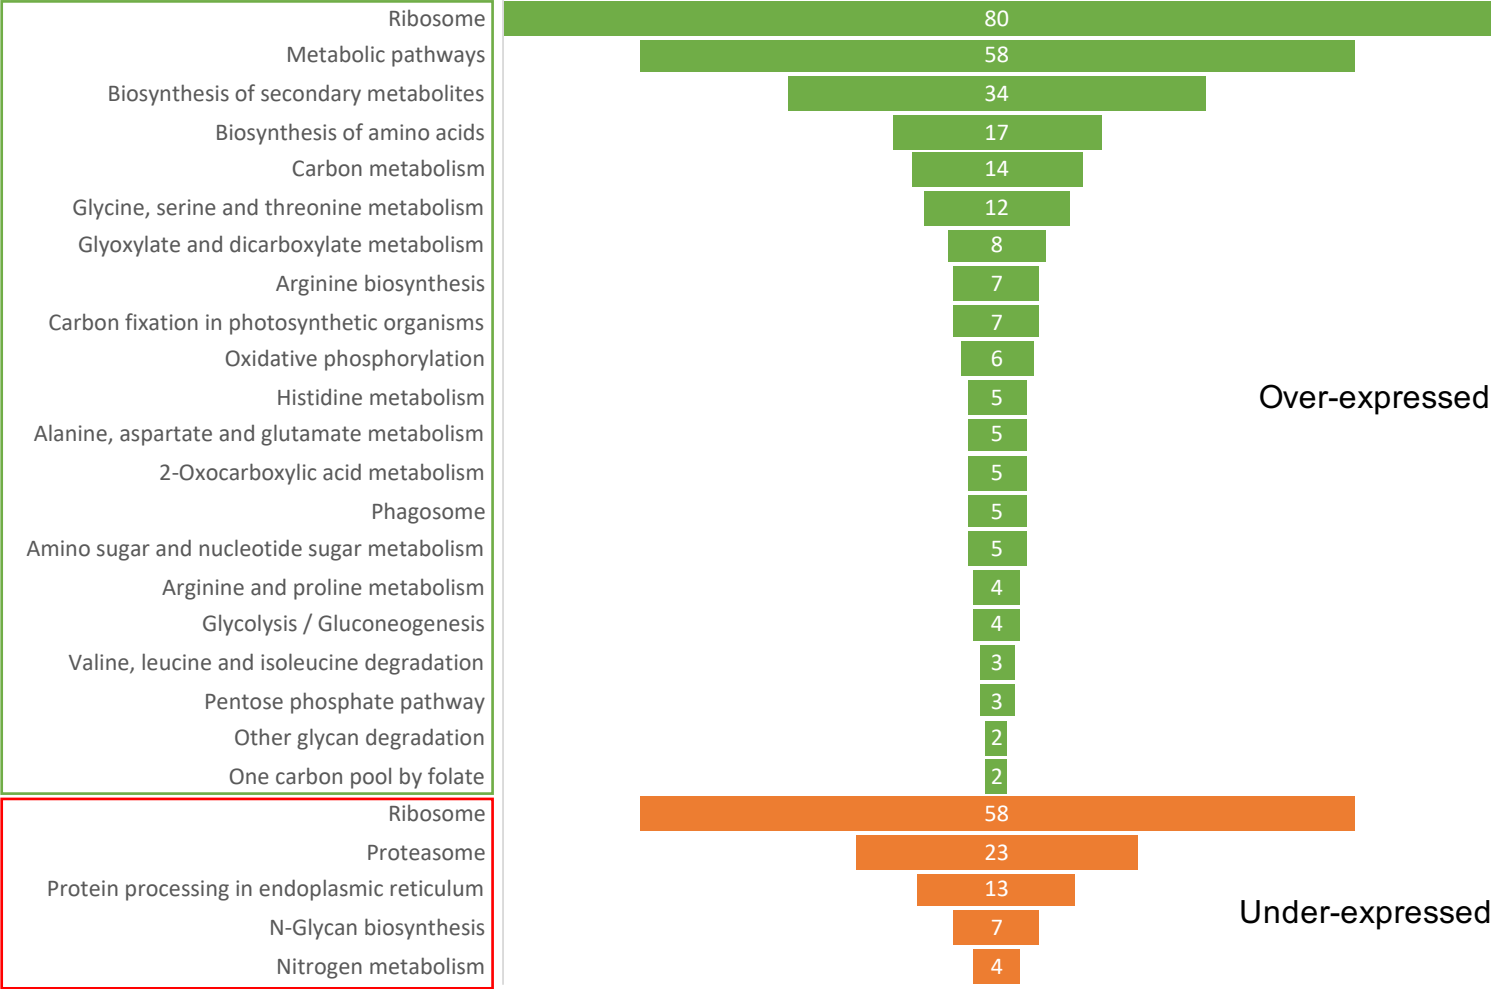

Supplement: s1 [file s1]
